# Supplementary material for: Towards a low-carbon future: exploring green urea synthesis for sustainable agriculture
Source: Royal Society of Chemistry journal article supplement (doi:10.1039/d3gc03228k), 2024-01-01
Supplement: d3gc03228k1.pdf [file d3gc03228k1.pdf]

# **Towards a Low-Carbon Future: Exploring Green Urea Synthesis for Sustainable Agriculture**

Ansub Khan, Abiha Abbas, and Rofice Dickson\*

Department of Chemistry & Chemical Engineering, SBA School of Science and Engineering, Lahore University of Management Sciences (LUMS),  
Lahore, 54792, Pakistan

[rofica.dickson@lums.edu.pk](mailto:rofica.dickson@lums.edu.pk)

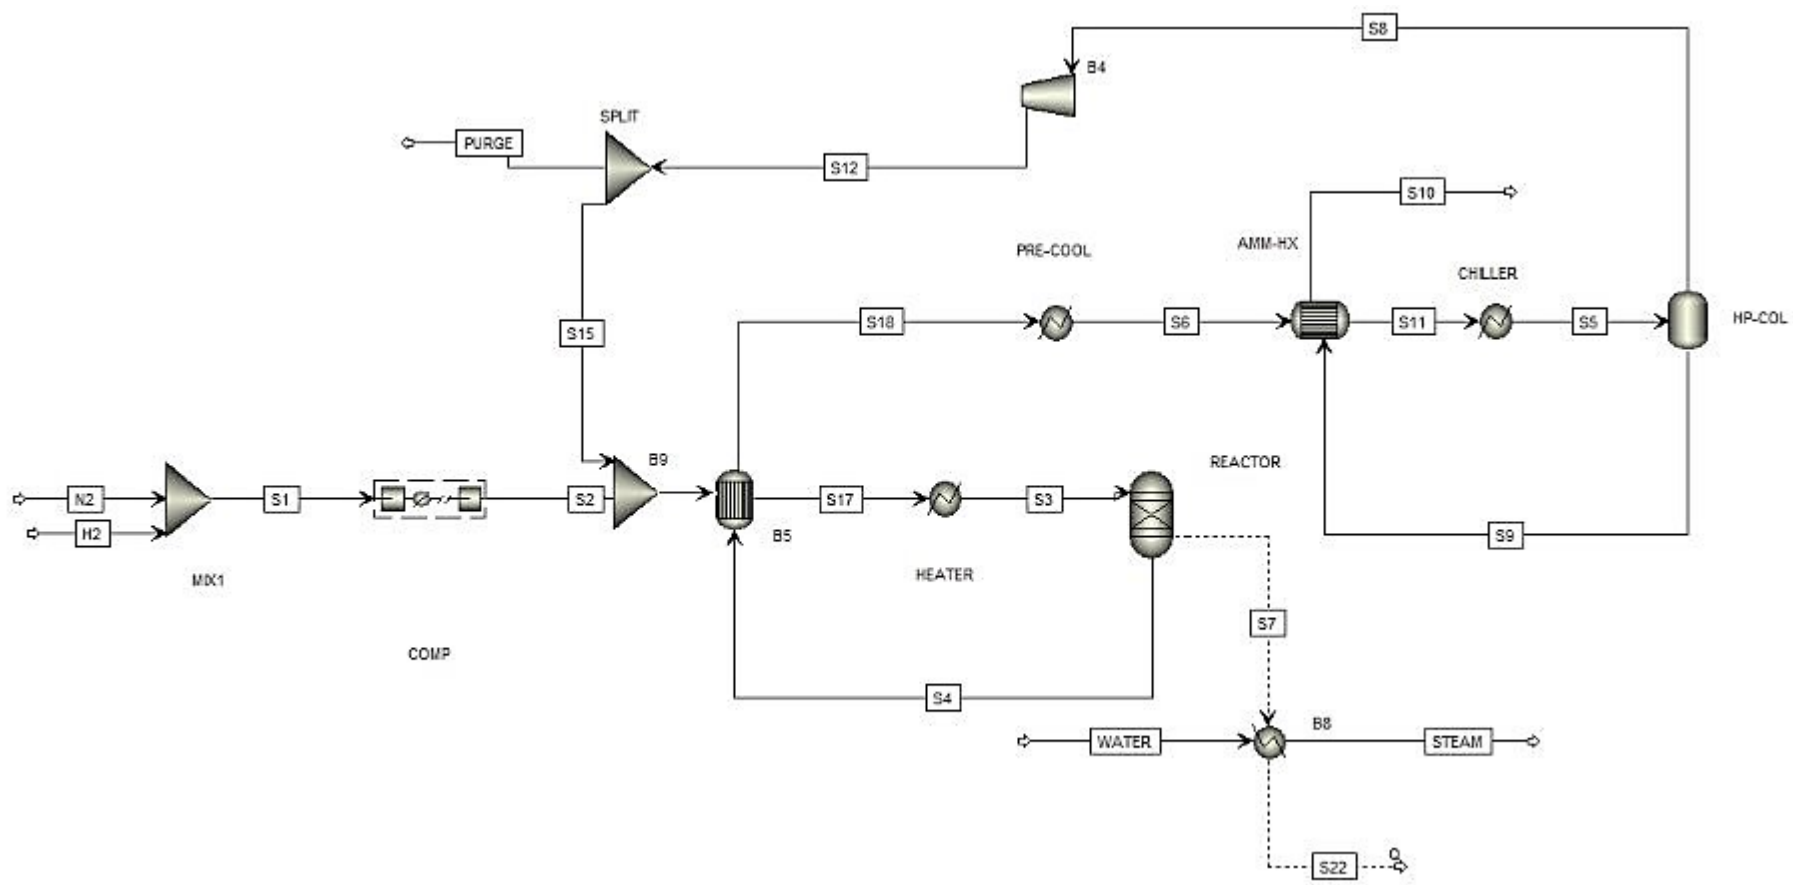

Fig. S1. Aspen plus model for ammonia synthesis.



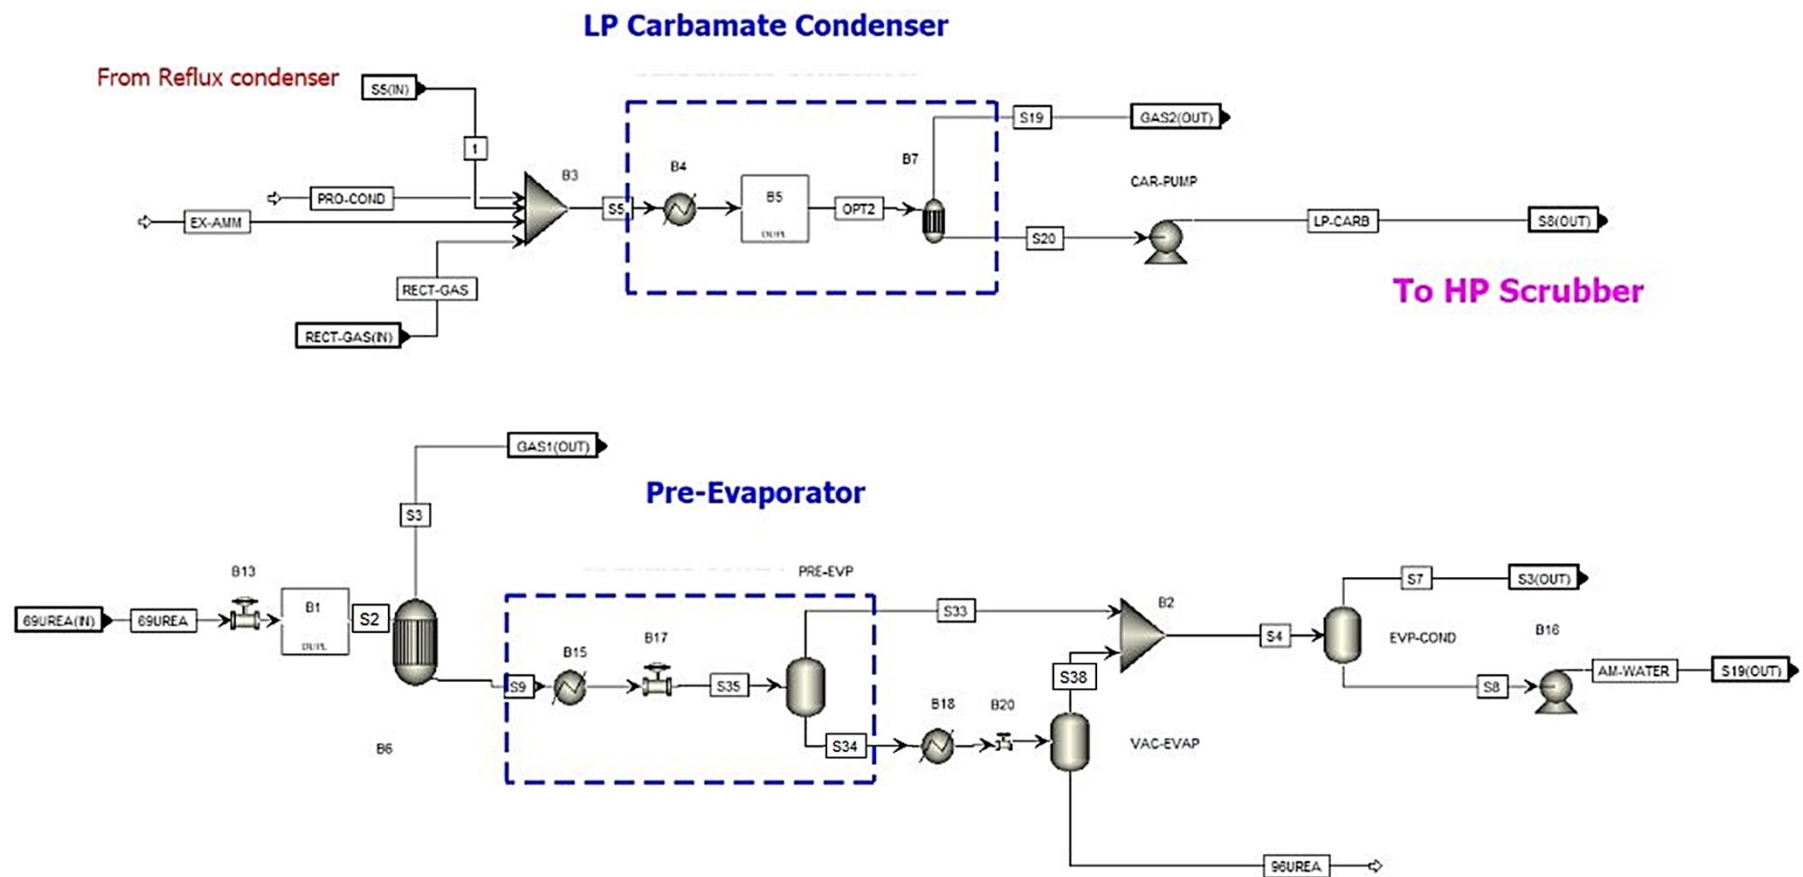

Fig. S3. Aspen plus model for urea synthesis: Low pressure section.

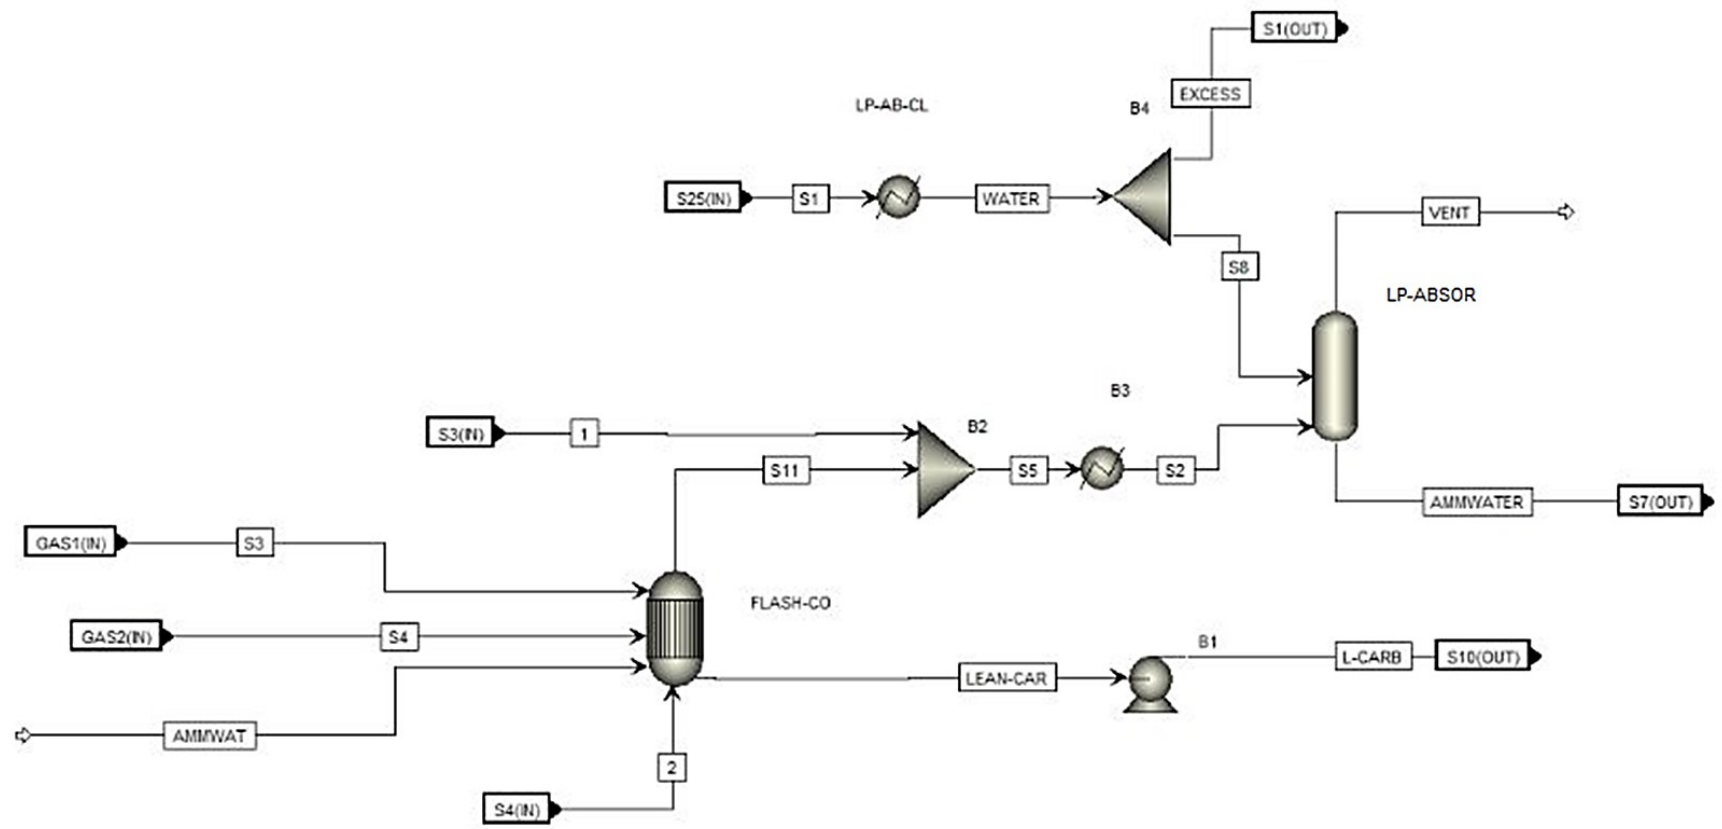

Fig. S4. Aspen plus model for urea synthesis: Evaporation section.



**Table S1.** Summary of technical and operating parameters for key unit operations.

| <b>Unit Operations</b>     | <b>Technical Parameters</b>                                                                                                                                                                                                                        |
|----------------------------|----------------------------------------------------------------------------------------------------------------------------------------------------------------------------------------------------------------------------------------------------|
| <b>Air separation unit</b> |                                                                                                                                                                                                                                                    |
| Air compressor             | Inlet pressure = 1 bar<br>Outlet pressure = 7.1 bar<br>Duty = 2.77 MW<br>Cooling duty = -2.77 MW<br>No. of stages = 2                                                                                                                              |
| Air cooler                 | Duty = -3.28 MW<br>Area = 146 m <sup>2</sup><br>Utility = Nitrogen from low pressure column                                                                                                                                                        |
| High pressure column       | No. of stages = 25<br>Distillate rate = 3,830 kg/h<br>Condenser and duty = Total and -0.48<br>Reboiler and duty = None<br>Operating pressure = 7.1 bar<br>Top stage temperature = -174°C<br>Bottom stage temperature = -172°C                      |
| Low pressure column        | No. of stages = 20<br>Distillate rate = 28,300 kg/h<br>Condenser and duty = Total and -4.68 MW<br>Reboiler and duty = Kettle type and 4.12 MW<br>Operating pressure = 1 bar<br>Top stage temperature = -196°C<br>Bottom stage temperature = -185°C |
| <b>Ammonia synthesis</b>   |                                                                                                                                                                                                                                                    |
| Compressor                 | Inlet pressure = 3 atm<br>Outlet pressure = 147 bar<br>Duty = 18.29 MW<br>Cooling duty = 18.16 MW<br>No. of stages = 5                                                                                                                             |
| Pre-heater                 | Outlet temperature = 380°C                                                                                                                                                                                                                         |

|                                    |                                                                                                                                                                                                                                                           |
|------------------------------------|-----------------------------------------------------------------------------------------------------------------------------------------------------------------------------------------------------------------------------------------------------------|
|                                    | Operating pressure = 147 bar<br>Duty = 37.18 MW                                                                                                                                                                                                           |
| Fired heater                       | Outlet temperature = 450°C<br>Operating pressure = 147 bar<br>Duty = 6.49 MW                                                                                                                                                                              |
| Ammonia reactor                    | Reactions = 3 Hydrogen + 2 Nitrogen → 2 Ammonia<br>Conversion = 35%<br>Operating temperature = 450°C<br>Operating pressure = 147 bar<br>Cooling Duty = 29.75 MW                                                                                           |
| Ammonia chiller                    | Inlet temperature = 19°C<br>Outlet temperature = -45°C<br>Operating pressure = 147 bar<br>Cooling Duty = 10.05 MW                                                                                                                                         |
| Ammonia separator                  | Operating temperature = -45°C<br>Operating pressure = 147 bar<br>Ammonia recovery = 97.5 wt.%                                                                                                                                                             |
| <b>Urea Synthesis – HP section</b> |                                                                                                                                                                                                                                                           |
| Urea reactor                       | Reactions = 2 Ammonia + Carbon dioxide → Ammonium carbamate<br>Ammonium carbamate → Carbon dioxide + 2 Ammonia<br>Ammonium carbamate → Urea + 2 Water<br>Urea + 2 Water → Ammonium carbamate<br>Residence time – 0.3 hr.<br>Operating temperature – 183°C |
| HP carbamate condenser             | Reactions = 2 Ammonia + Carbon dioxide → Ammonium carbamate<br>Conversion = 40%<br>Coolig Duty = 32.53 MW<br>Operating temperature = 167°C                                                                                                                |
| HP stripper                        | No. of stages = 10<br>Condenser and duty = None<br>Reboiler and duty = None<br>Side heating duty = 24.4 MW<br>Operating pressure = 138 bar                                                                                                                |



|                                             |                                                                                                                                                                                                                                                              |
|---------------------------------------------|--------------------------------------------------------------------------------------------------------------------------------------------------------------------------------------------------------------------------------------------------------------|
|                                             | <p>Top stage temperature = 168.2°C<br/> Bottom stage temperature = 185.3°C</p>                                                                                                                                                                               |
| HP scrubber                                 | <p>No. of stages = 5<br/> Distillate rate = 3,439 kg/h<br/> Condenser and duty = None<br/> Reboiler and duty = Kettle type &amp; 3.72 MW<br/> Operating pressure = 138 bar<br/> Top stage temperature = 104.85°C<br/> Bottom stage temperature = 166.5°C</p> |
| MP absorber                                 | <p>No. of stages = 5<br/> Distillate rate = 3390 kg/h<br/> Condenser and duty = None<br/> Reboiler and duty = None<br/> Operating pressure = 4 bar<br/> Top stage temperature = 26°C<br/> Bottom stage temperature = 27°C</p>                                |
| <b>Urea Synthesis – LP section</b>          |                                                                                                                                                                                                                                                              |
| Rectifier                                   | <p>No. of stages = 5<br/> Distillate rate = 27,084 kg/h<br/> Condenser and duty = None<br/> Reboiler and duty = Kettle type &amp; 12.79 MW<br/> Operating pressure = 4 bar<br/> Top stage temperature = 130°C<br/> Bottom stage temperature = 175°C</p>      |
| LP Carbamate condenser                      | <p>Duty = -15.87 MW<br/> Utility = Cooling water</p>                                                                                                                                                                                                         |
| Pre-evaporator                              | <p>Duty = 0.37 MW<br/> Utility = LP steam</p>                                                                                                                                                                                                                |
| <b>Urea Synthesis – Evaporation section</b> |                                                                                                                                                                                                                                                              |
| Flash condenser                             | <p>Duty = -2.97 MW<br/> Utility = Cooling water</p>                                                                                                                                                                                                          |
| Evaporator condenser                        | <p>Duty = -12.23 MW</p>                                                                                                                                                                                                                                      |

|                                            |                                                                                                                                                                                                                                                                                       |
|--------------------------------------------|---------------------------------------------------------------------------------------------------------------------------------------------------------------------------------------------------------------------------------------------------------------------------------------|
|                                            | Utility = Cooling water                                                                                                                                                                                                                                                               |
| Vacuum evaporator                          | Duty = 10.47 MW<br>Utility = LP steam                                                                                                                                                                                                                                                 |
| LP absorber                                | No. of stages = 5<br>Venting = 614 kg/h<br>Condenser and duty = None<br>Reboiler and duty = None<br>Operating pressure = 1 bar<br>Top stage temperature = 43°C<br>Bottom stage temperature = 43°C                                                                                     |
| <b>Urea Synthesis – Hydrolysis section</b> |                                                                                                                                                                                                                                                                                       |
| 1 <sup>st</sup> desorber                   | No. of stages = 15<br>Venting = 7,390 kg/h<br>Condenser and duty = None<br>Reboiler and duty = None<br>Operating pressure = 2.6 bar<br>Top stage temperature = 133°C<br>Bottom stage temperature = 135°C                                                                              |
| 2 <sup>nd</sup> desorber                   | No. of stages = 22<br>Venting = 9,235 kg/h<br>Condenser and duty = None<br>Reboiler and duty = None<br>Operating pressure = 3 bar<br>Top stage temperature = 139°C<br>Bottom stage temperature = 143°C                                                                                |
| Hydrolyser                                 | Reactions = Urea + Water → Carbon dioxide + 2 Ammonia<br>Ammonium carbamate → Carbon dioxide + 2 Ammonia<br>Conversion = 100% and 95% respectively.<br>Duty = 15.93 MW<br>Residence time = 1 h.<br>Operating temperature = 210°C<br>Operating pressure = 20 bar<br>Utility = HP steam |

**Table S2.** Area-wise installed costs for key equipment [1,2].

| <b>Equipment</b>                   | <b>Cost (million USD)</b> | <b>References</b> | <b>Equipment</b>                            | <b>Cost (million USD)</b> | <b>References</b> |
|------------------------------------|---------------------------|-------------------|---------------------------------------------|---------------------------|-------------------|
| <b>Air separation unit</b>         |                           |                   | <b>Urea synthesis – Evaporation section</b> |                           |                   |
| K-101                              | 6.53                      | Aspen             | E-204                                       | 0.53                      | Aspen             |
| E-102                              | 0.17                      | Aspen             | P-202                                       | 0.19                      | Aspen             |
| C-101                              | 1.20                      | Aspen             | E-205                                       | 0.28                      | Aspen             |
| C-102                              | 3.07                      | Aspen             | E-206                                       | 0.29                      | Aspen             |
| <b>Ammonia synthesis</b>           |                           |                   | P-203                                       | 0.04                      | Aspen             |
| K-102                              | 17.69                     | Aspen             | A-202                                       | 0.20                      | Aspen             |
| K-103                              | 1.51                      | Aspen             | <b>Urea synthesis – Hydrolysis section</b>  |                           |                   |
| E-103                              | 1.45                      | Aspen             | E-208                                       | 0.13                      | Aspen             |
| F-101                              | 6.90                      | Aspen             | E-209                                       | 0.19                      | Aspen             |
| R-101                              | 21.56                     | [1]               | E-210                                       | 0.10                      | Aspen             |
| E-104                              | 1.56                      | Aspen             | E-211                                       | 0.35                      | Aspen             |
| E-105                              | 0.47                      | Aspen             | C-202                                       | 0.38                      | Aspen             |
| E-106                              | 2.58                      | Aspen             | C-203                                       | 0.47                      | Aspen             |
| <b>Urea synthesis – HP section</b> |                           |                   | R-202                                       | 0.38                      | Aspen             |
| R-201                              | 2.64                      | Aspen             | P-204                                       | 0.05                      | Aspen             |
| K-201                              | 7.99                      | Aspen             | P-205                                       | 0.08                      | Aspen             |
| V-201                              | 0.81                      | Aspen             | P-206                                       | 0.07                      | Aspen             |
| S-201                              | 0.91                      | Aspen             | V-205                                       | 0.16                      | Aspen             |
| A-201                              | 0.25                      | Aspen             |                                             |                           |                   |
| E-201                              | 0.94                      | [2]               |                                             |                           |                   |
| S-202                              | 0.83                      | Aspen             |                                             |                           |                   |
| <b>Urea synthesis – LP section</b> |                           |                   |                                             |                           |                   |
| E-202                              | 0.28                      | Aspen             |                                             |                           |                   |
| P-201                              | 0.05                      | Aspen             |                                             |                           |                   |
| C-201                              | 0.97                      | Aspen             |                                             |                           |                   |
| V-203                              | 0.42                      | Aspen             |                                             |                           |                   |

**Table S3.** Techno-economic model parameters to calculate total capital investment. ISBL = Inside battery limit

| Factor                                | Value                   |
|---------------------------------------|-------------------------|
| <b>Total direct cost (TDC)</b>        |                         |
| Warehouse                             | 4% of ISBL              |
| Site development                      | 9% of ISBL              |
| Additional Piping                     | 4.5% of ISBL            |
| <b>Total indirect cost (TIDC)</b>     |                         |
| Prorateable costs                     | 10% of TDC              |
| Field expenses                        | 10% of TDC              |
| Home office and construction          | 20% of TDC              |
| Project contingency                   | 10% of TDC              |
| Other costs                           | 10% of TDC              |
| <b>Total capital investment (TCI)</b> |                         |
| Fixed capital investment (FCI)        | TDC+TIDC                |
| Working capital (WC)                  | 5% of FCI               |
| Land                                  | 6% of (Installed costs) |

**Table S4.** Chemical and utilities prices used to estimate total cost of manufacturing.[3][4][5]

| Parameter                  | Value |
|----------------------------|-------|
| <b>Chemicals (USD/t)</b>   |       |
| Hydrogen                   | 4000  |
| Carbon dioxide             | 50    |
| <b>Utilities (USD/MWh)</b> |       |
| Cooling water              | 1.01  |
| Refrigerant 1              | 32.04 |
| Refrigerant 2              | 11.99 |
| Fired Heater               | 15.30 |

|                                                 |        |
|-------------------------------------------------|--------|
| LP Steam                                        | 6.84   |
| MP Steam                                        | 9.00   |
| Power                                           | 68.20  |
| <b>Wastewater Treatment (USD/m<sup>3</sup>)</b> |        |
| Cost                                            | 0.04   |
| <b>Labour Cost (USD/y)</b>                      |        |
| Per person salary                               | 60,000 |
| <b>Products (USD/t)</b>                         |        |
| Urea                                            | 620    |
| Oxygen                                          | 170    |

**Table S5.** Assumed parameters for techno-economic model.

| Parameter                     | Value              |
|-------------------------------|--------------------|
| Cost basis year               | 2022 dollar values |
| Plant life                    | 30 years           |
| Depreciation of general plant | 7 yrs              |
| Discount rate                 | 10% per year       |
| Tax rate                      | 30% per year       |
| Construction period           | 2 years            |
| Operating hours per yr        | 8000               |

**Table S6.** Unit-specific inventory for conventional urea synthesis scaled per kg of urea.

|                        | SMR based hydrogen production[6] | Nitrogen production    | Ammonia synthesis      | Urea synthesis - HP section | Urea synthesis - LP section | Urea synthesis - Evaporation section | Urea synthesis - Hydrolysis section |
|------------------------|----------------------------------|------------------------|------------------------|-----------------------------|-----------------------------|--------------------------------------|-------------------------------------|
| <b>Utilities (kWh)</b> |                                  |                        |                        |                             |                             |                                      |                                     |
| Steam                  | -                                | -                      | $1.09 \times 10^{-01}$ | $3.48 \times 10^{-01}$      | $7.62 \times 10^{-04}$      | $2.15 \times 10^{-02}$               | $1.86 \times 10^{-01}$              |
| Refrigrant             | -                                | $8.99 \times 10^{-02}$ | $1.69 \times 10^{-01}$ | -                           | -                           | -                                    | -                                   |
| Power + Cooling        | $6.56 \times 10^{-02}$           | $4.83 \times 10^{-02}$ | $3.07 \times 10^{-01}$ | $1.17 \times 10^{-01}$      | $7.10 \times 10^{-03}$      | $8.89 \times 10^{-04}$               | $1.74 \times 10^{-03}$              |
| Natural gas            | $3.68 \times 10^{-01}$           | -                      | -                      | -                           | -                           | -                                    | -                                   |

| <b>Raw material (kg)</b>       |                        |                        |                        |                        |                        |                        |   |
|--------------------------------|------------------------|------------------------|------------------------|------------------------|------------------------|------------------------|---|
| Fresh Water                    | 8.56×10 <sup>-01</sup> | -                      | -                      | -                      | -                      | -                      | - |
| Treated water                  | 8.56×10 <sup>-01</sup> |                        |                        |                        |                        |                        |   |
| Hydrogen                       |                        | -                      | 1.04×10 <sup>-01</sup> | -                      | -                      | -                      | - |
| Nitrogen                       |                        | -                      | 4.83×10 <sup>-01</sup> | -                      | -                      | -                      | - |
| Ammonia                        |                        | -                      | -                      | 5.74×10 <sup>-01</sup> | 1.23×10 <sup>-04</sup> | -                      | - |
| Carbon dioxide                 |                        | -                      | -                      | 8.18×10 <sup>-01</sup> | -                      | -                      | - |
| Air                            | 2.67                   | 6.43×10 <sup>-01</sup> | -                      | -                      | -                      | -                      | - |
| Potassium hydroxide            |                        | -                      | -                      | -                      | -                      | -                      | - |
| Steam                          | 8.56×10 <sup>-01</sup> | -                      | -                      | -                      | -                      | -                      | - |
| MEA                            |                        |                        |                        |                        |                        |                        |   |
| <b>By-product (kg)</b>         |                        |                        |                        |                        |                        |                        |   |
| Oxygen                         | -                      | 1.34×10 <sup>-01</sup> | -                      | -                      | -                      | -                      | - |
| <b>Water emissions (kg)</b>    |                        |                        |                        |                        |                        |                        |   |
| Wastewater                     | 9.01×10 <sup>-01</sup> | -                      | -                      | -                      | -                      | -                      | - |
| <b>Fugitive emissions (kg)</b> |                        |                        |                        |                        |                        |                        |   |
| Nitrogen                       | 2.01                   | 1.05×10 <sup>-02</sup> | 1.30×10 <sup>-02</sup> | 9.40×10 <sup>-05</sup> | -                      | 3.26×10 <sup>-02</sup> | - |
| Argon                          | 3.41×10 <sup>-02</sup> | 6.00×10 <sup>-03</sup> | -                      | -                      | -                      | -                      | - |
| Oxygen                         | 5.57×10 <sup>-02</sup> | 1.34×10 <sup>-01</sup> | -                      | 5.74×10 <sup>-05</sup> | -                      | 4.85×10 <sup>-03</sup> | - |
| Carbon dioxide                 | 9.76×10 <sup>-01</sup> | -                      | -                      | 1.01×10 <sup>-02</sup> | -                      | 2.12×10 <sup>-02</sup> | - |
| Ammonia                        | -                      | -                      | 2.27×10 <sup>-04</sup> | 1.42×10 <sup>-06</sup> | -                      | 9.05×10 <sup>-07</sup> | - |
| Water                          | 4.11×10 <sup>-01</sup> | -                      | -                      | 3.97×10 <sup>-04</sup> | -                      | 2.86×10 <sup>-04</sup> | - |
| Hydrogen                       | -                      | -                      | 2.81×10 <sup>-03</sup> | -                      | -                      | -                      | - |
| Sulfur dioxide                 | 9.04×10 <sup>-07</sup> | -                      | -                      | -                      | -                      | -                      | - |
| NOx                            | 2.32×10 <sup>-05</sup> | -                      | -                      | -                      | -                      | -                      | - |
| Particulate matter < 2.5       | 3.49×10 <sup>-06</sup> | -                      | -                      | -                      | -                      | -                      | - |
| Carbon mono-oxide              | 3.34×10 <sup>-06</sup> | -                      | -                      | -                      | -                      | -                      | - |
| MEA                            | -                      | -                      | -                      | -                      | -                      | -                      | - |

|                       |        |
|-----------------------|--------|
| <b>Transportation</b> | 300 km |
|-----------------------|--------|

**Table S7.** Unit-specific inventory for green hydrogen-based urea synthesis scaled per kg of urea.

|                             | <b>Green hydrogen production</b> | <b>Nitrogen production</b> | <b>Ammonia synthesis</b> | <b>Carbon dioxide capture unit [5]</b> | <b>Urea synthesis - HP section</b> | <b>Urea synthesis - LP section</b> | <b>Urea synthesis - Evaporation section</b> | <b>Urea synthesis - Hydrolysis section</b> |
|-----------------------------|----------------------------------|----------------------------|--------------------------|----------------------------------------|------------------------------------|------------------------------------|---------------------------------------------|--------------------------------------------|
| <b>Utilities (kWh)</b>      |                                  |                            |                          |                                        |                                    |                                    |                                             |                                            |
| Steam                       | -                                | -                          | $1.09 \times 10^{-01}$   | 3.04                                   | $3.48 \times 10^{-01}$             | $7.62 \times 10^{-04}$             | $2.15 \times 10^{-02}$                      | $1.86 \times 10^{-01}$                     |
| Refrigrant                  | -                                | $8.99 \times 10^{-02}$     | $1.69 \times 10^{-01}$   | -                                      | -                                  | -                                  | -                                           | -                                          |
| Power + Cooling             | 5.22                             | $4.83 \times 10^{-02}$     | $3.07 \times 10^{-01}$   | $1.43 \times 10^{-02}$                 | $1.17 \times 10^{-01}$             | $7.10 \times 10^{-03}$             | $8.89 \times 10^{-04}$                      | $1.74 \times 10^{-03}$                     |
| Natural gas                 |                                  | -                          | -                        | -                                      | -                                  | -                                  | -                                           | -                                          |
| <b>Raw material (kg)</b>    |                                  |                            |                          |                                        |                                    |                                    |                                             |                                            |
| Fresh Water                 | -                                | -                          | -                        | $3.12 \times 10^{-02}$                 | -                                  | -                                  | -                                           | -                                          |
| Treated water               | $9.39 \times 10^{-01}$           |                            |                          | -                                      |                                    |                                    |                                             |                                            |
| Hydrogen                    |                                  | -                          | $1.04 \times 10^{-01}$   | -                                      | -                                  | -                                  | -                                           | -                                          |
| Nitrogen                    | $3.02 \times 10^{-05}$           | -                          | $4.83 \times 10^{-01}$   | -                                      | -                                  | -                                  | -                                           | -                                          |
| Ammonia                     | -                                | -                          | -                        | -                                      | $5.74 \times 10^{-01}$             | $1.23 \times 10^{-04}$             | -                                           | -                                          |
| Carbon dioxide              | -                                | -                          | -                        | -                                      | $8.18 \times 10^{-01}$             | -                                  | -                                           | -                                          |
| Air                         | -                                | $6.43 \times 10^{-01}$     | -                        | -                                      | -                                  | -                                  | -                                           | -                                          |
| Potassium hydroxide         | $1.98 \times 10^{-04}$           | -                          | -                        | -                                      | -                                  | -                                  | -                                           | -                                          |
| Steam                       | $1.14 \times 10^{-02}$           | -                          | -                        | -                                      | -                                  | -                                  | -                                           | -                                          |
| MEA                         | -                                | -                          | -                        | $7.54 \times 10^{-05}$                 | -                                  | -                                  | -                                           | -                                          |
| <b>By-product (kg)</b>      |                                  |                            |                          |                                        |                                    |                                    |                                             |                                            |
| Oxygen                      | -                                | $1.34 \times 10^{-01}$     | -                        | -                                      | -                                  | -                                  | -                                           | -                                          |
| <b>Water emissions (kg)</b> |                                  |                            |                          |                                        |                                    |                                    |                                             |                                            |
| Wastewater                  | $9.01 \times 10^{-01}$           | -                          | -                        | -                                      | -                                  | -                                  | -                                           | -                                          |

| Fugitive emissions (kg)  |                        |                        |                        |                        |                        |   |                        |   |
|--------------------------|------------------------|------------------------|------------------------|------------------------|------------------------|---|------------------------|---|
| Nitrogen                 | 2.01                   | $1.05 \times 10^{-02}$ | $1.30 \times 10^{-02}$ | -                      | $9.40 \times 10^{-05}$ | - | $3.26 \times 10^{-02}$ | - |
| Argon                    | $3.41 \times 10^{-02}$ | $6.00 \times 10^{-03}$ | -                      | -                      | -                      | - | -                      | - |
| Oxygen                   | $5.57 \times 10^{-02}$ | $1.34 \times 10^{-01}$ | -                      | -                      | $5.74 \times 10^{-05}$ | - | $4.85 \times 10^{-03}$ | - |
| Carbon dioxide           | $9.76 \times 10^{-01}$ | -                      | -                      | -                      | $1.01 \times 10^{-02}$ | - | $2.12 \times 10^{-02}$ | - |
| Ammonia                  | -                      | -                      | $2.27 \times 10^{-04}$ | -                      | $1.42 \times 10^{-06}$ | - | $9.05 \times 10^{-07}$ | - |
| Water                    | $4.11 \times 10^{-01}$ | -                      | -                      | -                      | $3.97 \times 10^{-04}$ | - | $2.86 \times 10^{-04}$ | - |
| Hydrogen                 | -                      | -                      | $2.81 \times 10^{-03}$ | -                      | -                      | - | -                      | - |
| Sulfur dioxide           | $9.04 \times 10^{-07}$ | -                      | -                      | -                      | -                      | - | -                      | - |
| NOx                      | $2.32 \times 10^{-05}$ | -                      | -                      | -                      | -                      | - | -                      | - |
| Particulate matter < 2.5 | $3.49 \times 10^{-06}$ | -                      | -                      | -                      | -                      | - | -                      | - |
| Carbon mono-oxide        | $3.34 \times 10^{-06}$ | -                      | -                      | -                      | -                      | - | -                      | - |
| MEA                      | -                      | -                      | -                      | $1.73 \times 10^{-05}$ | -                      | - | -                      | - |
| <b>Transportation</b>    | 300 km                 |                        |                        |                        |                        |   |                        |   |

**Table S8** Complete material and energy balance of urea production process.

| Stream*                  | NH <sub>3</sub> Input | CO <sub>2</sub> input | HP carbamate condenser Inlet | HP carbamate condenser outlet | Urea reactor outlet | HP scrubber Inlet |          | HP scrubber outlet |         |
|--------------------------|-----------------------|-----------------------|------------------------------|-------------------------------|---------------------|-------------------|----------|--------------------|---------|
|                          | NH <sub>3</sub>       | CO <sub>2</sub>       | S02                          | S03                           | S04                 | HP-Gases          | S9       | S17                | S15     |
| Temperature (°C)         | 34                    | 100                   | 145.79                       | 167                           | 183                 | 183               | 78.24    | 166.52             | 104.85  |
| Pressure (bar)           | 156.9                 | 138.27                | 138.27                       | 138.27                        | 138.27              | 138.27            | 138.27   | 138.27             | 138.27  |
| Energy (MW)              | 0.34                  | 6.49                  | -32.53                       | -                             | -                   | 3.72              |          | -                  | -       |
| Mass flow (kg/h)         | 33000                 | 47000                 | 201523.03                    | 201523.03                     | 201523.03           | 18749.88          | 32091.38 | 47402.11           | 3439.15 |
| <b>Composition (wt%)</b> |                       |                       |                              |                               |                     |                   |          |                    |         |
| Urea                     | 0                     | 0                     | 0.09                         | 0.09                          | 29.01               | 0.09              | 0.08     | 0.09               | 0       |
| Carbamate                | 0                     | 0                     | 13.39                        | 53.04                         | 26.47               | 0.02              | 51.87    | 56.85              | 0       |
| CO <sub>2</sub>          | 0                     | 94.50                 | 34.12                        | 11.76                         | 5.54                | 42.41             | 0.01     | 1.90               | 36.26   |



|                          |                                      |                   |                                    |                                     |                            |                              |            |                                 |                |
|--------------------------|--------------------------------------|-------------------|------------------------------------|-------------------------------------|----------------------------|------------------------------|------------|---------------------------------|----------------|
| <b>NH<sub>3</sub></b>    | 100                                  | 0                 | 42.33                              | 25.03                               | 20.22                      | 42.61                        | 4.04       | 10.07                           | 0.59           |
| <b>H<sub>2</sub>O</b>    | 0                                    | 0.90              | 8.95                               | 8.95                                | 17.62                      | 3.20                         | 44.00      | 31.02                           | 0.55           |
| <b>N<sub>2</sub></b>     | 0                                    | 4.00              | 0.97                               | 0.97                                | 0.97                       | 10.12                        | 0          | 0.05                            | 54.50          |
| <b>O<sub>2</sub></b>     | 0                                    | 0.60              | 0.16                               | 0.16                                | 1.55                       | 0.09                         | 0          | 0.03                            | 8.10           |
| <b>Stream</b>            | <b>MP absorber Inlet</b>             |                   | <b>MP absorber outlet</b>          |                                     | <b>Urea to HP stripper</b> | <b>HP Stripper outlet</b>    |            | <b>Rectifier outlet</b>         |                |
|                          | <b>S61</b>                           | <b>AW+(Water)</b> | <b>S25</b>                         | <b>S24</b>                          | <b>33 Urea</b>             | <b>55 Urea</b>               | <b>S08</b> | <b>Rect-Gas</b>                 | <b>69 Urea</b> |
| <b>Temperature (°C)</b>  | 77.46                                | 25.04+(45.00)     | 26.90                              | 25.93                               | 183.00                     | 168.23                       | 185.30     | 130.36                          | 174.78         |
| <b>Pressure (bar)</b>    | 5.07                                 | 3.92+(3.92)       | 3.92                               | 3.92                                | 138.27                     | 138.27                       | 138.27     | 4.12                            | 4.12           |
| <b>Energy (MW)</b>       | -                                    | -                 | -                                  | -                                   | -                          | 24.40                        |            | 12.79                           |                |
| <b>Mass flow (kg/h)</b>  | 3439.15                              | 85192.51+(3000)   | 68911.72                           | 3390.01                             | 182772.56                  | 108651.88                    | 121120.64  | 27084.03                        | 81567.84       |
| <b>Composition (wt%)</b> |                                      |                   |                                    |                                     |                            |                              |            |                                 |                |
| <b>Urea</b>              | 0                                    | 3.90+(0)          | 3.72                               | 0                                   | 31.98                      | 53.67                        | 0.11       | 0.06                            | 71.47          |
| <b>Carbamate</b>         | 0                                    | 0.20+(0)          | 0.25                               | 0                                   | 29.19                      | 12.20                        | 0.02       | 0                               | 0              |
| <b>CO<sub>2</sub></b>    | 36.26                                | 0.04+(0)          | 0.04                               | 36.00                               | 1.76                       | 2.18                         | 56.02      | 36.32                           | 0              |
| <b>NH<sub>3</sub></b>    | 0.59                                 | 0.01+(0)          | 0.02                               | 0                                   | 17.92                      | 2.48                         | 39.25      | 31.30                           | 0              |
| <b>H<sub>2</sub>O</b>    | 0.55                                 | 95.85+(100)       | 95.96                              | 0.48                                | 19.10                      | 29.46                        | 2.75       | 32.28                           | 28.53          |
| <b>N<sub>2</sub></b>     | 54.50                                | (0)+(0)           | 0                                  | 55.30                               | 0.03                       | 0.01                         | 1.60       | 0.02                            | 0              |
| <b>O<sub>2</sub></b>     | 8.10                                 | (0)+(0)           | 0                                  | 8.22                                | 0.02                       | 0                            | 0.25       | 0.01                            | 0              |
| <b>Stream</b>            | <b>LP carbamate condenser outlet</b> |                   | <b>Atmospheric separator inlet</b> | <b>Atmospheric separator outlet</b> |                            | <b>Pre-evaporator outlet</b> |            | <b>Vacuum evaporator outlet</b> |                |
|                          | <b>S20</b>                           | <b>S19</b>        | <b>S2</b>                          | <b>S9</b>                           | <b>S3</b>                  | <b>S34</b>                   | <b>S33</b> | <b>96 Urea</b>                  | <b>S38</b>     |
| <b>Temperature (°C)</b>  | 74                                   | 74                | 132.26                             | 132.27                              | 132.27                     | 95.11                        | 95.11      | 138.85                          | 138.85         |
| <b>Pressure (bar)</b>    | 3.24                                 | 3.24              | 1.30                               | 1.30                                | 1.30                       | 0.38                         | 0.38       | 0.29                            | 0.29           |
| <b>Energy (MW)</b>       |                                      | -15.87            |                                    |                                     |                            |                              | -0.37      |                                 |                |
| <b>Mass flow (kg/h)</b>  | 33780.39                             | 18.42             | 81567.84                           | 77411.32                            | 4156.52                    | 74861.40                     | 2549.92    | 59674.01                        | 15187.39       |
| <b>Composition (wt%)</b> |                                      |                   |                                    |                                     |                            |                              |            |                                 |                |
| <b>Urea</b>              | 0.08                                 | 4.57              | 71.47                              | 75.29                               | 0.46                       | 77.84                        | 0.24       | 96.31                           | 5.30           |
| <b>Carbamate</b>         | 51.87                                | 0                 | 0                                  | 0                                   | 0                          | 0                            | 0          | 0                               | 0              |
| <b>CO<sub>2</sub></b>    | 0.01                                 | 0                 | 0                                  | 0                                   | 0                          | 0                            | 0          | 0                               | 0              |

|                          |                          |                          |                              |                 |                               |                 |              |                              |                 |
|--------------------------|--------------------------|--------------------------|------------------------------|-----------------|-------------------------------|-----------------|--------------|------------------------------|-----------------|
| NH <sub>3</sub>          | 4.04                     | 0                        | 0                            | 0               | 0.01                          | 0               | 0            | 0                            | 0               |
| H <sub>2</sub> O         | 44.00                    | 95.43                    | 28.53                        | 24.71           | 99.53                         | 22.16           | 99.76        | 3.69                         | 94.7            |
| N <sub>2</sub>           | 0                        | 0                        | 0                            | 0               | 0                             | 0               | 0            | 0                            | 0               |
| O <sub>2</sub>           | 0                        | 0                        | 0                            | 0               | 0                             | 0               | 0            | 0                            | 0               |
| <b>Stream</b>            | <b>LP absorber inlet</b> |                          | <b>LP absorber outlet</b>    |                 | <b>First Desorber inlet</b>   |                 |              | <b>First Desorber outlet</b> |                 |
|                          | <b>S8</b>                | <b>S2</b>                | <b>Vent</b>                  | <b>AMMWATER</b> | <b>Feed</b>                   | <b>Reflux 1</b> | <b>Top 2</b> | <b>Top 1</b>                 | <b>Bottom 1</b> |
| <b>Temperature (°C)</b>  | 40.00                    | 47.90                    | 42.57                        | 42.89           | 117.00                        | 40.00           | 138.69       | 132.72                       | 135.41          |
| <b>Pressure (bar)</b>    | 1.96                     | 0.98                     | 0.98                         | 0.98            | 3.96                          | 3.56            | 3.96         | 3.63                         | 3.63            |
| <b>Energy (MW)</b>       | -                        | -                        | -                            | -               | -                             | -               | -            | -                            | -               |
| <b>Mass flow (kg/h)</b>  | 13782.34                 | 626.04                   | 613.79                       | 13794.60        | 20798.71                      | 6707.68         | 9234.90      | 7390.24                      | 29351.05        |
| <b>Composition (wt%)</b> |                          |                          |                              |                 |                               |                 |              |                              |                 |
| <b>Urea</b>              | 3.72                     | 0                        | 0                            | 3.72            | 3.90                          | 0.14            | 0            | 0                            | 2.79            |
| <b>Carbamate</b>         | 0.25                     | 0                        | 0                            | 0.25            | 0.20                          | 0.91            | 0            | 0                            | 0.35            |
| <b>CO<sub>2</sub></b>    | 0.04                     | 93.83                    | 94.84                        | 0.08            | 0.04                          | 0.15            | 7.12         | 9.13                         | 0               |
| <b>NH<sub>3</sub></b>    | 0                        | 0.13                     | 0.01                         | 0.02            | 0.01                          | 7.52            | 8.80         | 13.73                        | 1.04            |
| <b>H<sub>2</sub>O</b>    | 95.96                    | 4.58                     | 3.72                         | 95.92           | 95.85                         | 91.28           | 84.09        | 77.14                        | 95.81           |
| <b>N<sub>2</sub></b>     | 0                        | 0.90                     | 0.88                         | 0               | 0                             | 0               | 0            | 0                            | 0               |
| <b>O<sub>2</sub></b>     | 0                        | 0.56                     | 0.54                         | 0               | 0                             | 0               | 0            | 0                            | 0               |
| <b>Stream</b>            | <b>Hydrolyzer inlet</b>  | <b>Hydrolyzer outlet</b> | <b>Second Desorber inlet</b> |                 | <b>Second Desorber outlet</b> |                 |              |                              |                 |
|                          | <b>S9</b>                | <b>S10</b>               | <b>Feed 2</b>                | <b>LP-Steam</b> | <b>Top 2</b>                  | <b>Bottom 2</b> |              |                              |                 |
| <b>Temperature (°C)</b>  | 200.00                   | 210.00                   | 148.00                       | 142.90          | 138.69                        | 143.20          |              |                              |                 |
| <b>Pressure (bar)</b>    | 19.61                    | 19.61                    | 19.61                        | 3.92            | 3.96                          | 3.96            |              |                              |                 |
| <b>Energy (MW)</b>       | 15.93                    | -                        | -                            | -               | -                             | -               |              |                              |                 |
| <b>Mass flow (kg/h)</b>  | 29351.05                 | 29351.06                 | 29351.06                     | 8000.00         | 28116.16                      | 9234.90         |              |                              |                 |
| <b>Composition (wt%)</b> |                          |                          |                              |                 |                               |                 |              |                              |                 |
| <b>Urea</b>              | 2.79                     | 0                        | 0                            | 0               | 0                             | 0               |              |                              |                 |
| <b>Carbamate</b>         | 0.35                     | 0.02                     | 0.02                         | 0               | 0                             | 0.02            |              |                              |                 |
| <b>CO<sub>2</sub></b>    | 0                        | 2.24                     | 2.24                         | 0               | 7.12                          | 0               |              |                              |                 |
| <b>NH<sub>3</sub></b>    | 1.04                     | 2.77                     | 2.77                         | 0               | 8.80                          | 0               |              |                              |                 |

|                  |       |       |       |     |       |       |
|------------------|-------|-------|-------|-----|-------|-------|
| H <sub>2</sub> O | 95.81 | 94.98 | 95.98 | 100 | 84.09 | 99.98 |
| N <sub>2</sub>   | 0     | 0     | 0     | 0   | 0     | 0     |
| O <sub>2</sub>   | 0     | 0     | 0     | 0   | 0     | 0     |

\* Refer to process flow diagrams (Figure S1-S5) for more details about the process streams.

**Table S9.** Comparative environmental assessment results for conventional and green urea synthesis.

| Impact category                  | Unit                     | Conventional urea synthesis | Green hydrogen-based urea synthesis |
|----------------------------------|--------------------------|-----------------------------|-------------------------------------|
| Abiotic depletion                | kg Sb eq                 | 1.99×10 <sup>-05</sup>      | 1.55×10 <sup>-05</sup>              |
| Abiotic depletion (fossil fuels) | MJ                       | 2.89×10 <sup>01</sup>       | 1.80×10 <sup>01</sup>               |
| Global warming (GWP100a)         | kg CO2 eq                | 1.64                        | 1.38                                |
| Ozone layer depletion (ODP)      | kg CFC-11 eq             | 9.55×10 <sup>-08</sup>      | 8.98×10 <sup>-08</sup>              |
| Human toxicity                   | kg 1,4-DB eq             | 1.25                        | 7.84×10 <sup>-01</sup>              |
| Freshwater aquatic ecotoxicity   | kg 1,4-DB eq             | 8.20×10 <sup>-01</sup>      | 7.98×10 <sup>-01</sup>              |
| Marine aquatic ecotoxicity       | kg 1,4-DB eq             | 1.68×10 <sup>03</sup>       | 1.45×10 <sup>03</sup>               |
| Terrestrial ecotoxicity          | kg 1,4-DB eq             | 1.93×10 <sup>-03</sup>      | 1.73×10 <sup>-03</sup>              |
| Photochemical oxidation          | kg C2H4 eq               | 3.31×10 <sup>-04</sup>      | 2.48×10 <sup>-04</sup>              |
| Acidification                    | kg SO2 eq                | 7.49×10 <sup>-03</sup>      | 4.50×10 <sup>-03</sup>              |
| Eutrophication                   | kg PO4 <sup>---</sup> eq | 2.27×10 <sup>-03</sup>      | 1.51×10 <sup>-03</sup>              |

**Table S10.** Stagewise breakdown of environmental assessment results for green hydrogen-based urea synthesis. ADP: Abiotic depletion potential; AFFDP = Fossil fuel depletion potential; GWP = Global warming potential; ODP = Ozone depletion potential; HTP = Human toxicity potential; FWAETP = Freshwater aquatic ecotoxicity potential; MAETP = Marine aquatic ecotoxicity potential; TEP = Terrestrial ecotoxicity potential; PCOP = Photochemical oxidation potential; ACP = Acidification potential; EP = Eutrophication potential.

| Impact category | Green hydrogen production | Nitrogen production    | Ammonia synthesis      | Carbon dioxide capture unit | Urea synthesis - HP section | Urea synthesis - LP section | Urea synthesis - Evaporation section | Urea synthesis - Hydrolysis section | Transportation         | Infrastructure         |
|-----------------|---------------------------|------------------------|------------------------|-----------------------------|-----------------------------|-----------------------------|--------------------------------------|-------------------------------------|------------------------|------------------------|
| ADP (kg Sb eq.) | 1.33×10 <sup>-05</sup>    | 4.32×10 <sup>-07</sup> | 1.07×10 <sup>-06</sup> | 3.57×10 <sup>-07</sup>      | 1.16×10 <sup>-07</sup>      | 6.60×10 <sup>-09</sup>      | 1.29×10 <sup>-09</sup>               | 5.60×10 <sup>-09</sup>              | 1.32×10 <sup>-07</sup> | 1.16×10 <sup>-07</sup> |
| AFFDP (MJ)      | 2.82                      | 6.61×10 <sup>-01</sup> | 3.73                   | 6.66                        | 2.45                        | 5.72×10 <sup>-02</sup>      | 1.04×10 <sup>-01</sup>               | 8.47×10 <sup>-01</sup>              | 6.19×10 <sup>-01</sup> | 6.31×10 <sup>-03</sup> |

|                                             |                        |                        |                        |                        |                        |                         |                         |                        |                        |                        |
|---------------------------------------------|------------------------|------------------------|------------------------|------------------------|------------------------|-------------------------|-------------------------|------------------------|------------------------|------------------------|
| GWP (kg CO <sub>2</sub> eq.)                | 2.48×10 <sup>-01</sup> | 5.53×10 <sup>-02</sup> | 3.29×10 <sup>-01</sup> | 4.19×10 <sup>-01</sup> | 1.95×10 <sup>-01</sup> | 5.11×10 <sup>-03</sup>  | 2.83×10 <sup>-02</sup>  | 5.67×10 <sup>-02</sup> | 4.22×10 <sup>-02</sup> | 6.05×10 <sup>-04</sup> |
| ODP (kg CFC-11eq.)                          | 2.69×10 <sup>-08</sup> | 2.60×10 <sup>-09</sup> | 1.12×10 <sup>-08</sup> | 3.87×10 <sup>-08</sup> | 2.64×10 <sup>-09</sup> | 1.47×10 <sup>-10</sup>  | 3.22×10 <sup>-11</sup>  | 1.55×10 <sup>-10</sup> | 7.45×10 <sup>-09</sup> | 3.84×10 <sup>-11</sup> |
| HTP (kg 1,4-DBeq.)                          | 4.74×10 <sup>-01</sup> | 3.24×10 <sup>-02</sup> | 1.75×10 <sup>-01</sup> | 4.47×10 <sup>-02</sup> | 3.26×10 <sup>-02</sup> | 1.91×10 <sup>-03</sup>  | 3.09×10 <sup>-04</sup>  | 1.07×10 <sup>-03</sup> | 1.63×10 <sup>-02</sup> | 5.11×10 <sup>-03</sup> |
| FWAETP (kg 1,4-DBeq.)                       | 4.97×10 <sup>-01</sup> | 2.62×10 <sup>-02</sup> | 2.04×10 <sup>-01</sup> | 2.53×10 <sup>-02</sup> | 3.29×10 <sup>-02</sup> | 1.99×10 <sup>-03</sup>  | 2.53×10 <sup>-04</sup>  | 5.17×10 <sup>-04</sup> | 6.91×10 <sup>-03</sup> | 2.73×10 <sup>-03</sup> |
| MAETP (kg 1,4-DBeq.)                        | 6.91×10 <sup>02</sup>  | 7.11×10 <sup>01</sup>  | 4.76×10 <sup>02</sup>  | 5.59×10 <sup>01</sup>  | 1.23×10 <sup>02</sup>  | 7.41                    | 1.00                    | 2.45                   | 1.47×10 <sup>01</sup>  | 3.77                   |
| TEP (kg 1,4-DBeq.)                          | 7.66×10 <sup>-04</sup> | 1.06×10 <sup>-04</sup> | 5.32×10 <sup>-04</sup> | 8.78×10 <sup>-05</sup> | 1.66×10 <sup>-04</sup> | 9.79E×10 <sup>-06</sup> | 1.51E×10 <sup>-06</sup> | 4.85×10 <sup>-06</sup> | 5.20×10 <sup>-05</sup> | 4.61×10 <sup>-06</sup> |
| PCOP (kg C <sub>2</sub> H <sub>4</sub> eq.) | 7.48×10 <sup>-05</sup> | 9.32×10 <sup>-06</sup> | 6.94×10 <sup>-05</sup> | 4.68×10 <sup>-05</sup> | 3.06×10 <sup>-05</sup> | 8.69×10 <sup>-07</sup>  | 1.15×10 <sup>-06</sup>  | 9.20×10 <sup>-06</sup> | 5.53×10 <sup>-06</sup> | 2.78×10 <sup>-07</sup> |
| ACP (kg SO <sub>2</sub> eq.)                | 1.35×10 <sup>-03</sup> | 1.94×10 <sup>-04</sup> | 1.56×10 <sup>-03</sup> | 5.38×10 <sup>-04</sup> | 5.61×10 <sup>-04</sup> | 2.11×10 <sup>-05</sup>  | 1.76×10 <sup>-05</sup>  | 1.22×10 <sup>-04</sup> | 1.37×10 <sup>-04</sup> | 5.96×10 <sup>-06</sup> |
| EP (kg PO <sub>4</sub> eq.)                 | 5.13×10 <sup>-04</sup> | 7.84×10 <sup>-05</sup> | 5.79×10 <sup>-04</sup> | 9.17×10 <sup>-05</sup> | 1.79×10 <sup>-04</sup> | 9.06×10 <sup>-06</sup>  | 3.30×10 <sup>-06</sup>  | 1.82×10 <sup>-05</sup> | 3.11×10 <sup>-05</sup> | 2.24×10 <sup>-06</sup> |

## References

- [1] Morgan ER. Techno-economic feasibility study of ammonia plants powered by offshore wind. University of Massachusetts - Amherst, PhD Dissertations 2013:432.
- [2] Zhang H, Wang L, Van herle J, Maréchal F, Desideri U. Techno-economic comparison of 100% renewable urea production processes. Appl Energy 2021;284. <https://doi.org/10.1016/j.apenergy.2020.116401>.
- [3] Chemanalyst n.d. <https://www.chemanalyst.com/Pricing/Pricingoverview> (accessed August 15, 2023).
- [4] The Pennsylvania State University. PenState General stores 2022. <https://generalstores.psu.edu/pricing-and-lead-time> (accessed August 15, 2023).

- [5] Abbas A, Qadeer K, Al-Hinai A, Tarar MH, Qyyum MA, Al-Muhtaseb AH, et al. Process development and policy implications for large scale deployment of solar-driven electrolysis-based renewable methanol production. *Green Chemistry* 2022. <https://doi.org/10.1039/d2gc01993k>.
- [6] National energy technology laboratory. NETL Life cycle inventory data - Unit process library 2022. <https://netl.doe.gov/node/2573> (accessed August 27, 2023).
